# Supplementary material for: Silver Cluster‐Porphyrin‐Assembled Materials as Advanced Bioprotective Materials for Combating Superbacteria
Source: PubMed Central journal article supplement (PMC8805555; doi:10.1002/advs.202103721), 2021-11-10
Supplement: ADVS-9-2103721-s001.pdf [file ADVS-9-2103721-s001.pdf]

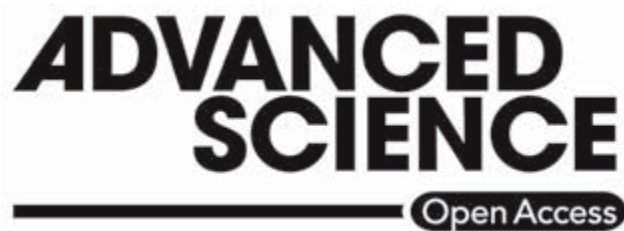

## Supporting Information

for *Adv. Sci.*, DOI: 10.1002/adv.202103721

Silver cluster-porphyrin assembled materials as advanced bioprotective materials for combating superbacteria

*Man Cao, Shan Wang, Jia-Hua Hu, Bing-Huai Lu, Qian-You Wang\* and Shuang-Quan Zang\**

## Supporting Information

### **Silver cluster-porphyrin assembled materials as advanced bioprotective materials for combating superbacteria**

*Man Cao<sup>†</sup>, Shan Wang<sup>†</sup>, Jia-Hua Hu, Bing-Huai Lu, Qian-You Wang\* and Shuang-Quan Zang\**

#### **Supplementary Text**

##### Materials and measurements

All reagents and solvents were commercially available and used as received. Non-woven fabric employed in this work is non-woven fabric with polypropylene (PP). Its density is  $0.31 \text{ g cm}^{-3}$ . Powder X-ray diffraction (PXRD) patterns of the samples were obtained in the range of  $3\text{-}50^\circ$  on a Rigaku D/Max-2500PC X-ray diffractometer with Cu K $\alpha$  radiation ( $\lambda = 1.54178 \text{ \AA}$ ) at 298 K. The optical absorption and diffused reflectance spectra were obtained on a Hitachi UH4150 spectrophotometer. Single-crystal X-ray diffraction (SCXRD) was performed on a Rigaku XtaLAB Pro diffractometer using Cu K $\alpha$  radiation ( $\lambda = 1.54184 \text{ \AA}$ ). X-ray photoelectron spectroscopy (XPS) was performed on a Thermo ESCALAB 250XI electron spectrometer using 300 W Al K $\alpha$  radiation. The C peak at 284.6 eV was used as a reference to correct for charging effects. Scanning electron microscopy (SEM) images were obtained using a Zeiss Sigma 500. The electrochemical performance and photoelectrochemical performance were measured in a three-electrode quartz cell system using a platinum plate as the counter electrode, a Ag/AgCl electrode as the reference electrode, and a Ag<sub>9</sub>AgTPyP-coated platinized carbon electrode as the working electrode. The electrolyte was 0.2 M Na<sub>2</sub>SO<sub>4</sub>. The photoelectrochemical results were recorded using a CHI660E electrochemical station. Visible light irradiation was achieved by using an 80 mW/cm<sup>2</sup> white LED using Perfect Light PCX-50C ( $\lambda > 420 \text{ nm}$ ). Electron paramagnetic resonance (EPR) signals were recorded with a Bruker A300 spectrometer. ICP-TOFMS signals were obtained using an Optima 9500. Confocal images were taken with LEICA TCS SP8 STED fluorescence confocal microscopy system.

##### In Vitro Cytotoxicity Assay

Cell Counting Kit-8 (CCK-8) assays were carried out to estimate the cytotoxicity of Ag<sub>9</sub>-AgTPyP. HeLa cells were cultured in RPMI-1640 medium with 10% FBS and 1% penicillin-streptomycin at 37°C, 5% CO<sub>2</sub>. Briefly, HeLa cells were cultured in a 96-well plate at a density of  $1 \times 10^4$  cells per well (100  $\mu\text{L}$  medium/well). After cultivation overnight, the old medium was replaced with 100  $\mu\text{L}$  fresh medium containing different concentrations of Ag<sub>9</sub>-AgTPyP (0, 5, 10, 20, 40, 80, 160 mg L<sup>-1</sup>) for another 12 h incubation. Then, the cells were washed with DPBS completely and incubated in 100  $\mu\text{L}$  of culture medium containing 10% CCK-8 at 37 °C for additional 1 h. The plate was softly shaken for 30 s and then the absorbance at 450 nm was measured on a microplate reader.

##### Live/Dead Cell Fluorescence Assay

Above differentially processed bacteria within 0.9% (w/v) saline solution were collected by centrifugation with 8000 rpm respectively. The collected bacteria cells were stained in dark by incubating with  $1.5 \mu\text{L mL}^{-1}$  SYRTO9 and  $1.5 \mu\text{L mL}^{-1}$  PI together for 30 min. Then, 10  $\mu\text{L}$  of bacterial solution was dropped onto a glass slide. Confocal images were taken with LEICA TCS SP8 STED fluorescence confocal microscopy system (excitation: 488 and 552 nm).

#### Transient absorption (TA) measurements

The femtosecond TA data were recorded on a modified pump-probe spectrometer (Helios Fire, Ultrafast Systems LLC) in combination with an ultrafast laser system (Coherent). The 520 nm pump pulse at  $\sim 150 \mu\text{J/cm}^2$  was delivered by an optical parametric amplifier (OPA). The white-light continuum (WLC) probe pulses (430-760 nm) were generated by focusing the 800 nm beam onto a sapphire plate. The pump-probe delay was controlled by an optical delay line. The temporal and spectral profiles (chirp-corrected) of the pump-induced differential transmission of the WLC probe light (i.e., absorbance change) were visualized by an optical fiber-coupled multichannel spectrometer (with a CMOS sensor). The 500 nm shortpass filter was inserted before the detector to remove the pump pulse so that only 430-500 nm probe range were detected.

#### 3,3',5,5'-Tetramethylbenzidine (TMB) Oxidation Measurements

Typically, 3 mg of TMB was dispersed with 1 mL of  $\text{H}_2\text{O}$  and 2 mL of HAc/NaAc buffer solution (1:1, 0.1 M).  $\text{Ag}_0\text{-AgTPyP}$  (2.50 mg,  $1 \mu\text{mol}$ ), TPyP (0.62 mg,  $1 \mu\text{mol}$ ) and AgTPP (0.72 mg,  $1 \mu\text{mol}$ ) was then added into the mixture solution under white LED light ( $>420 \text{ nm}$ ) irradiation respectively. The samples were taken at different time intervals using the function of UV-vis absorption plot record on Microplate Reader. In order to verify the specific ROS, various scavengers were added into the TMB solution before the light irradiation: carotene (2 mg), mannite (2 mg), catalase (1 mg), and superoxide dismutase (SOD, 0.5 mL), respectively.

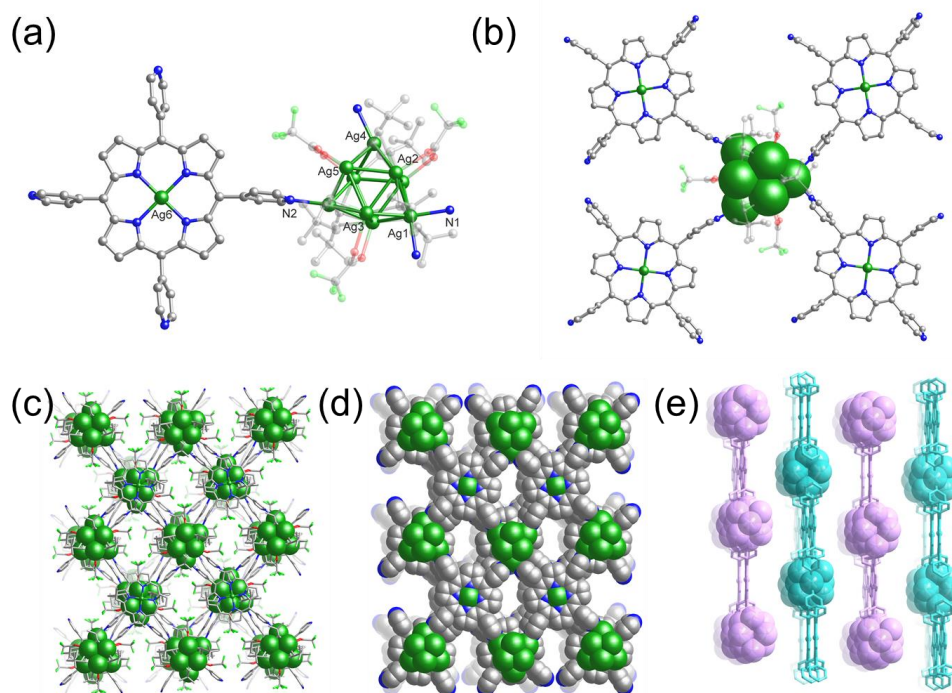

**Figure S1.** Summary of structural information about Ag<sub>9</sub>-AgTPyP: (a) The coordination environments of the Ag(I) centres in Ag<sub>9</sub>-AgTPyP. Colour code: Ag, dark green; F, green; O, red; N, blue; C, grey. Symmetry codes: #1 1-X, +Y, 1/2-Z; #2 +X, -1+Y, +Z; #3 1-X, -1+Y, 1/2-Z; #4 3/2-X, 3/2-Y, 1-Z; #5 +X, 1+Y, +Z (b) Different coordination sites of two kinds of nitrogen atoms. (c) A 3D (4, 4) connected framework was formed by the 4-connected AgTPyP linkers and Ag<sub>9</sub> clusters. (d) 3D spacing stacking and (e) twofold AB packed structure.

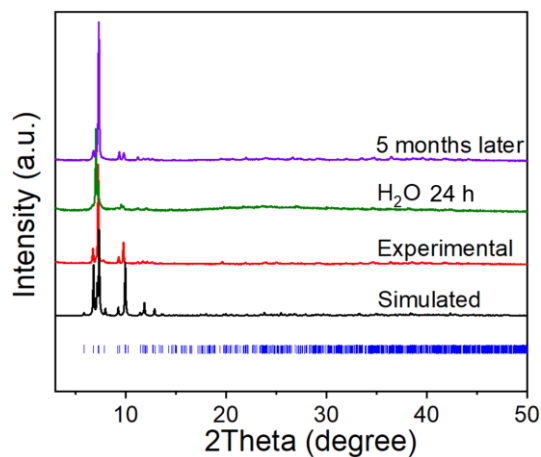

**Figure S2.** PXRD patterns of  $\text{Ag}_9\text{-AgTPyP}$  under water conditions for 24 h and 5 months later.

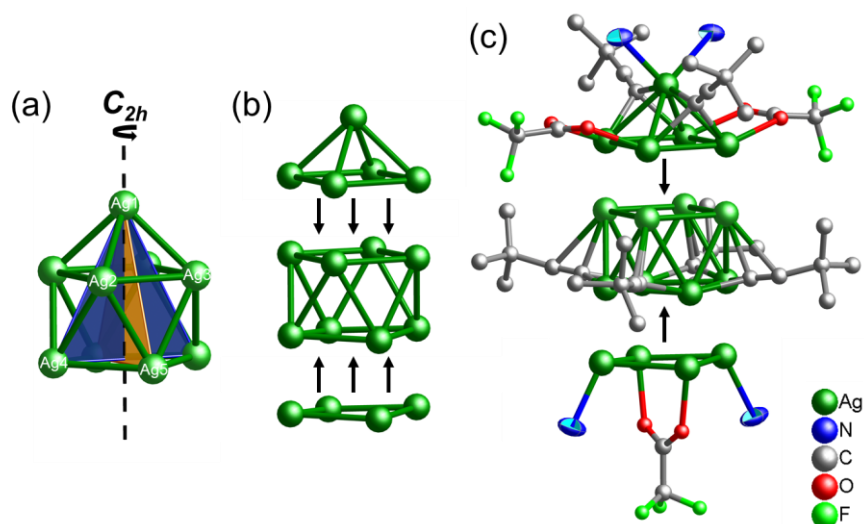

**Figure S3.** Summary of structural information about the  $\text{Ag}_9$  core of  $\text{Ag}_9\text{-AgTPyP}$ : (a) the tower-like  $\text{Ag}_9$  core of the cluster with a  $C_{2h}$  axis of symmetry. (b) The anatomy of the  $\text{Ag}_9$  core. (c) The core protected by the ligand. Colour code: Ag, dark green; F, green; O, red; N, blue; C, grey.

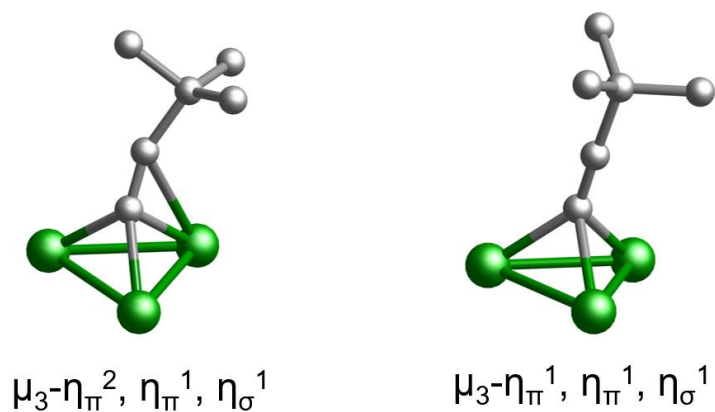

**Figure S4.** The coordination modes of  $t\text{-BuC}\equiv\text{C}^-$  in  $\text{Ag}_9\text{-AgTPyP}$ .

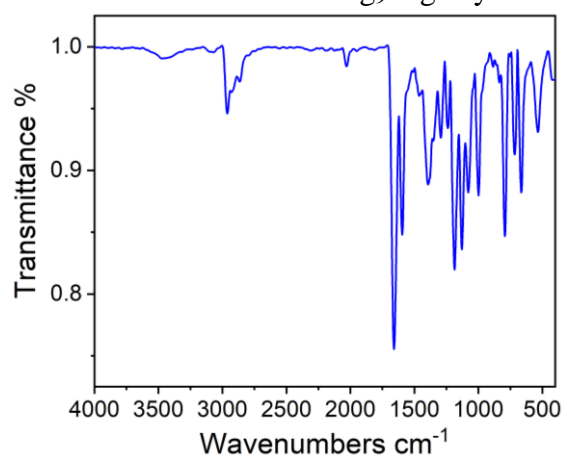

**Figure S5.** Infrared spectrogram of  $\text{Ag}_9\text{-AgTPyP}$ .

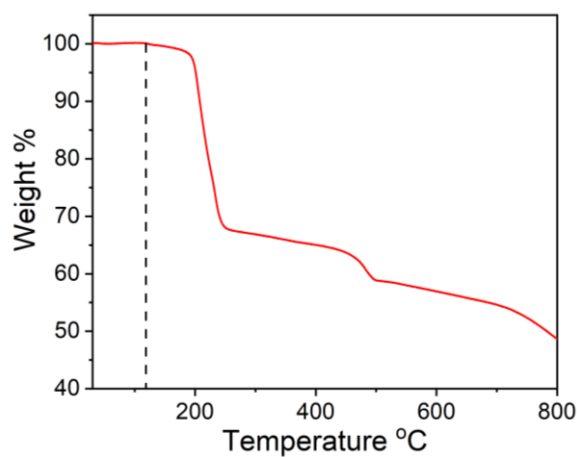

**Figure S6.** The TG curve of  $\text{Ag}_9\text{-AgTPyP}$ .

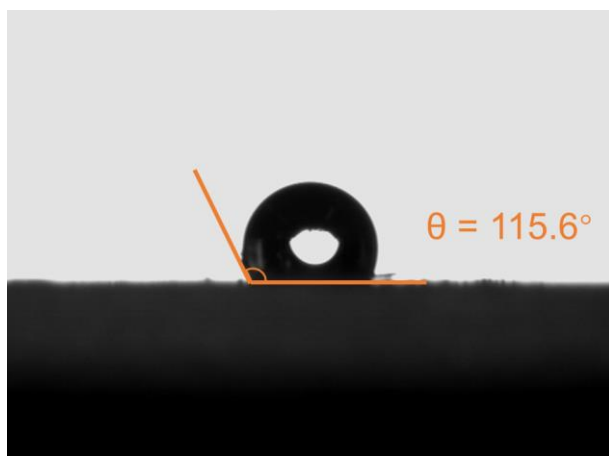

**Figure S7.** Water contact-angle of Ag<sub>9</sub>-AgTPyP.

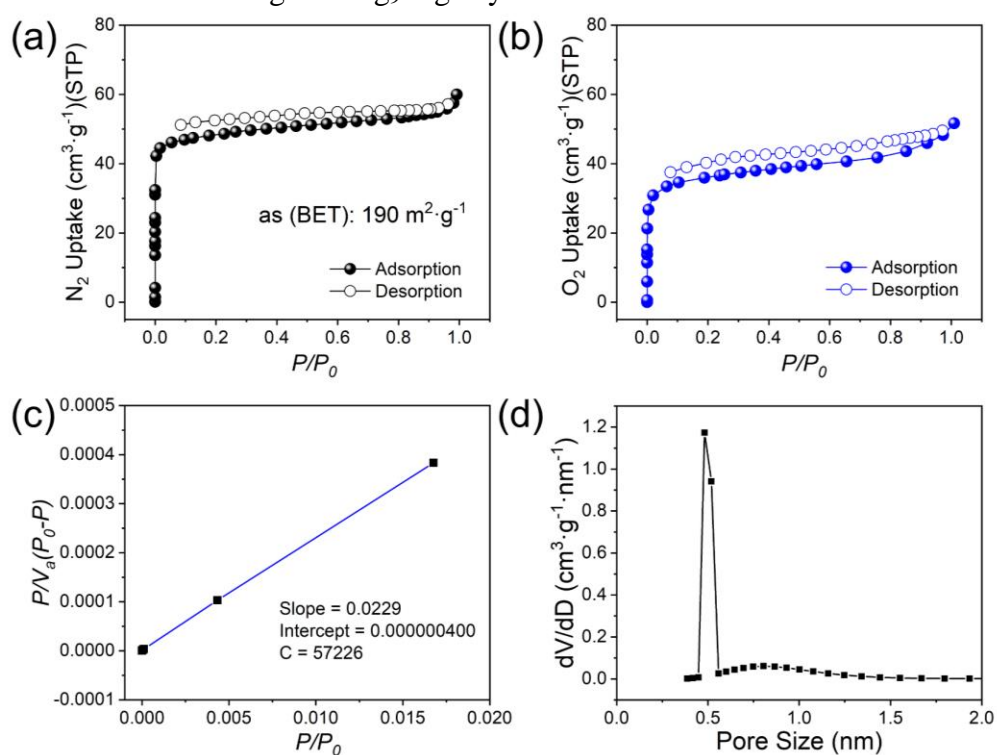

**Figure S8.**  $N_2$  (a) and  $O_2$  (b) adsorption isotherms of Ag<sub>9</sub>-AgTPyP at 77 K. (c) Selected BET Plots of Ag<sub>9</sub>-AgTPyP for BET surface area calculation and constant C based on  $N_2$  adsorption isotherm at 77 K. (d) Pore size distribution profile based on nonlocal density function theory (NLDFT) of Ag<sub>9</sub>-AgTPyP.

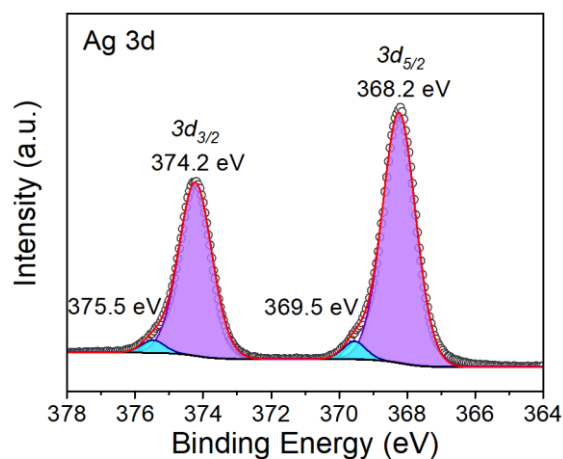

**Figure S9.** Ag 3d XPS spectra of Ag<sub>9</sub>-AgTPyP.

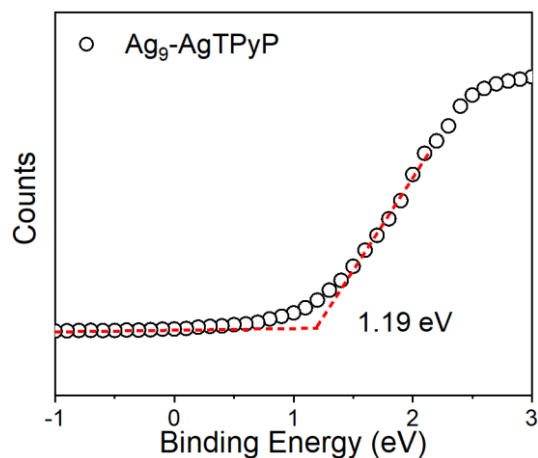

**Figure S10.** VB-XPS spectra of Ag<sub>9</sub>-AgTPyP. The energy scales were aligned by using the Fermi level of the XPS instrument (4.35 eV versus the absolute vacuum value).

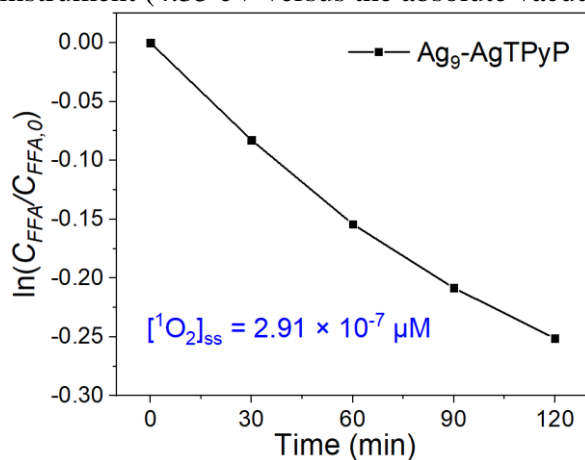

**Figure S11.** Steady state concentration of  $[^1\text{O}_2]_{\text{ss}}$  calculated from the decay of furfuryl alcohol (FFA) of Ag<sub>9</sub>-AgTPyP.



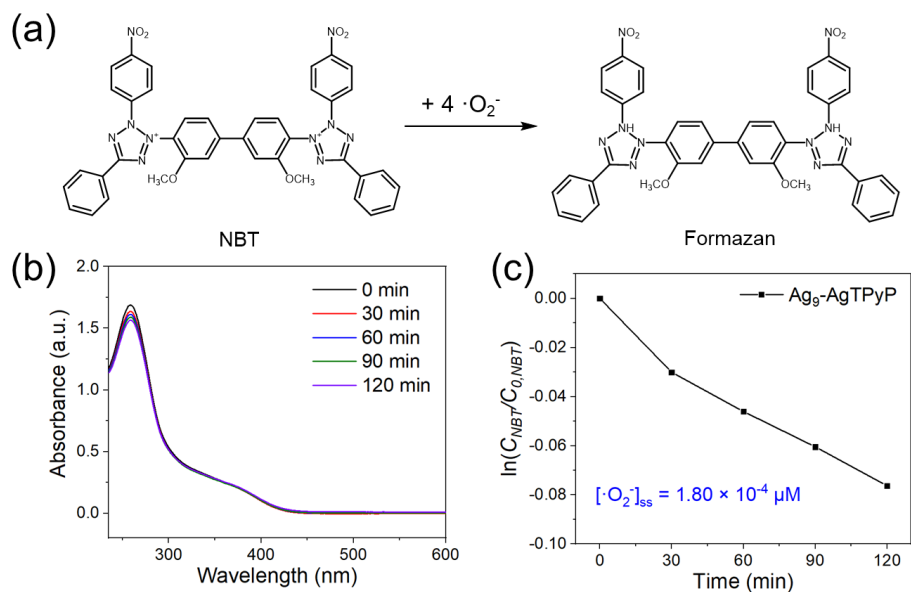

**Figure S12.** (a) Equations for the decay reaction of nitroblue tetrazole (NBT). (b) Time-dependent absorption spectra of NBT for  $\cdot\text{O}_2^-$  detection by  $\text{Ag}_9\text{-AgTPyP}$ . (c) Steady-state concentration of  $[\cdot\text{O}_2^-]_{\text{ss}}$  calculated from the decay of NBT.

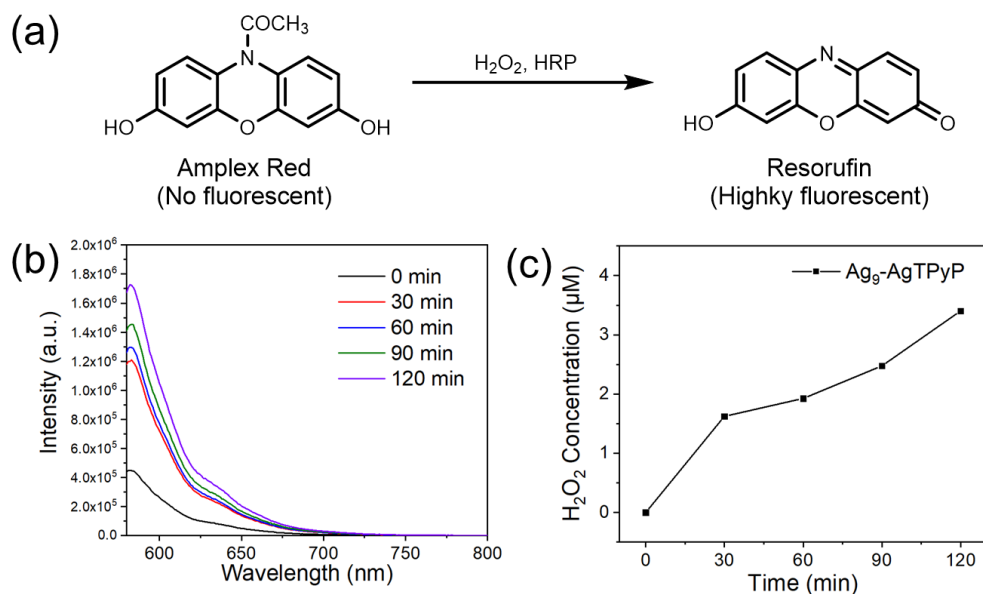

**Figure S13.** (a) Equations for the oxidation of N-acetyl-3,7-dihydroxyphenoxazine (Amplex red). (b) Time-dependent fluorescence spectra of Amplex Red for  $\text{H}_2\text{O}_2$  detection. (c)  $\text{H}_2\text{O}_2$  accumulation over time of  $\text{Ag}_9\text{-AgTPyP}$ .

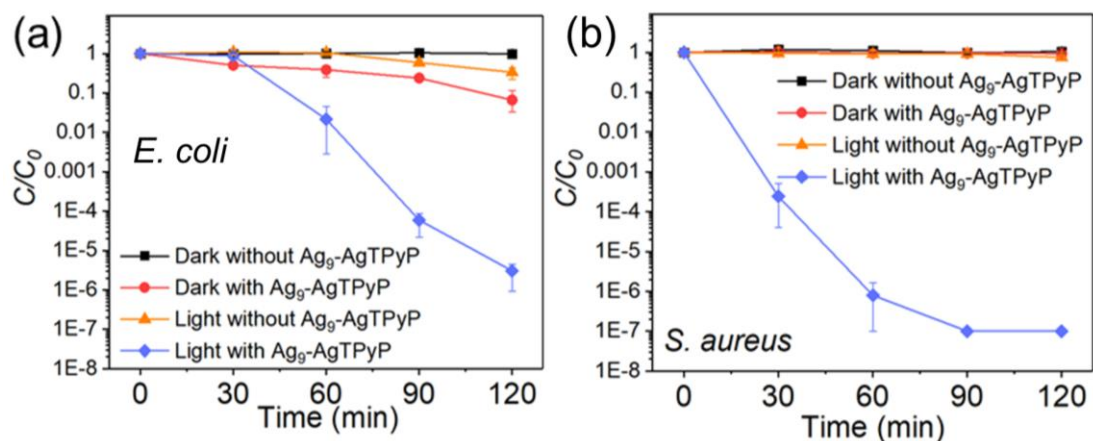

**Figure S14.** The antibacterial kinetics of the action of  $\text{Ag}_9\text{-AgTPyP}$  on (A) *E. coli* and (B) *S. aureus*.

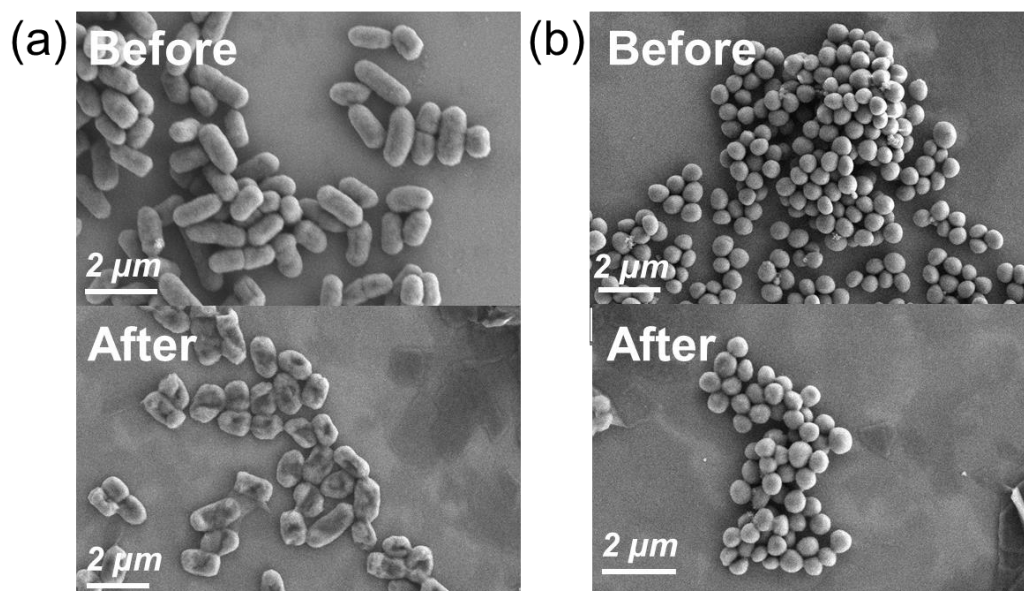

**Figure S15.** SEM images of (a) *E. coli*. and (b) *S. aureus* before and after photocatalytic disinfection with  $\text{Ag}_9\text{-AgTPyP}$ .

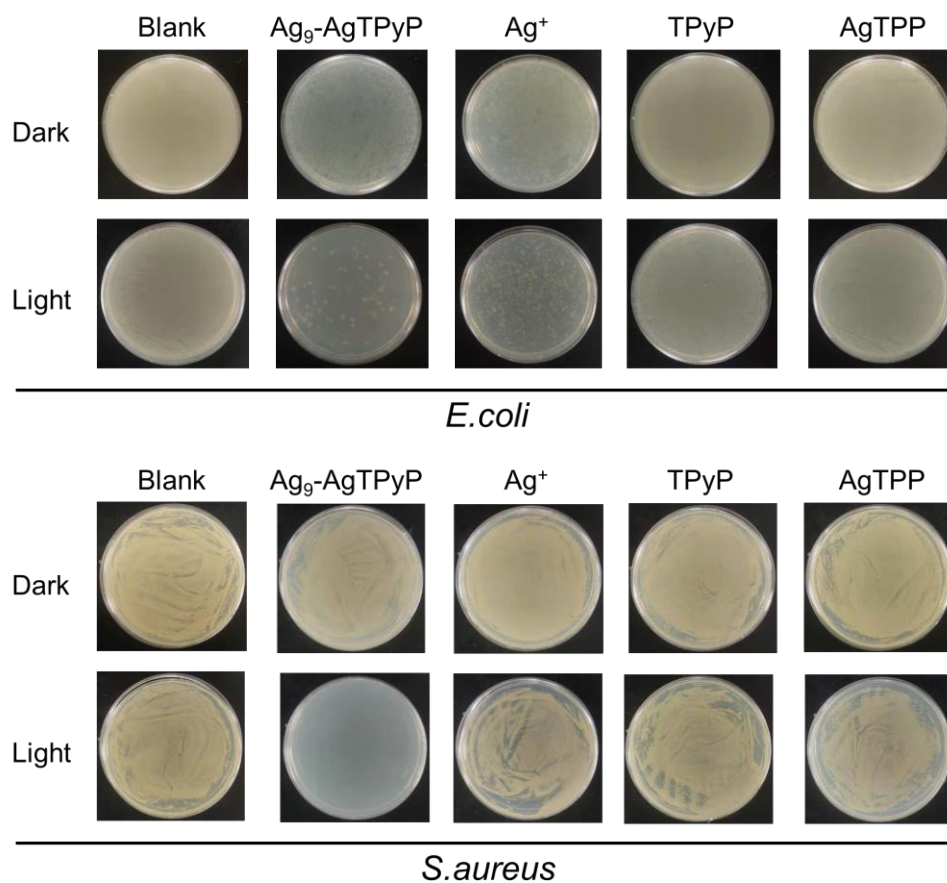

**Figure S16.** Photos of plate count agars spread with *E. coli* and *S. aureus* before and after photocatalytic disinfection using Ag<sub>9</sub>-AgTPyP (0.5 mg), Ag<sup>+</sup>, TPyP and AgTPP.

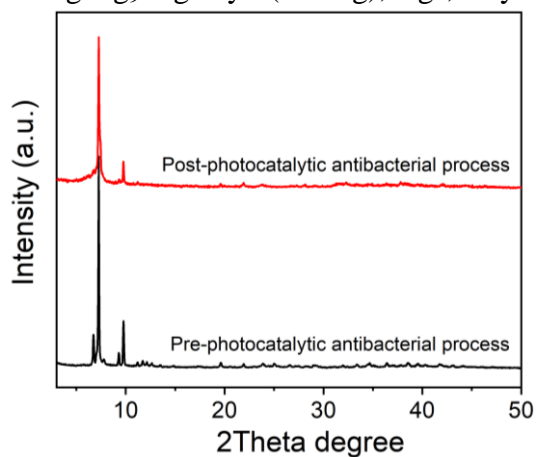

**Figure S17.** Post and pre- photocatalytic antibacterial process PXRD patterns of Ag<sub>9</sub>-AgTPyP.

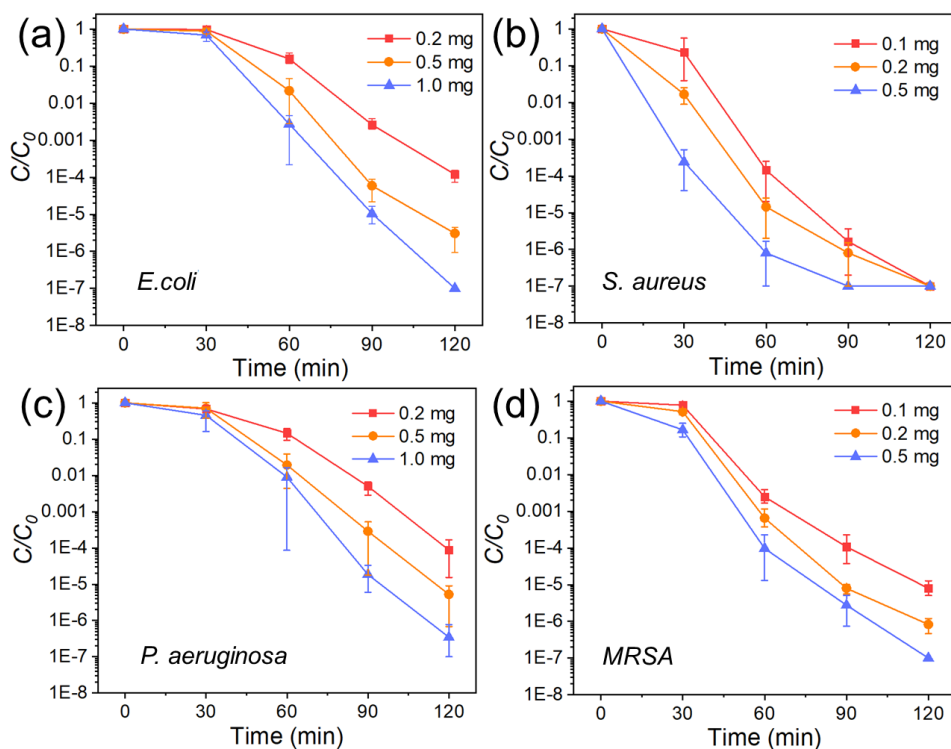

**Figure S18.** Optimization of modification mass of Ag<sub>9</sub>-AgTPyP for antibacterial tests.

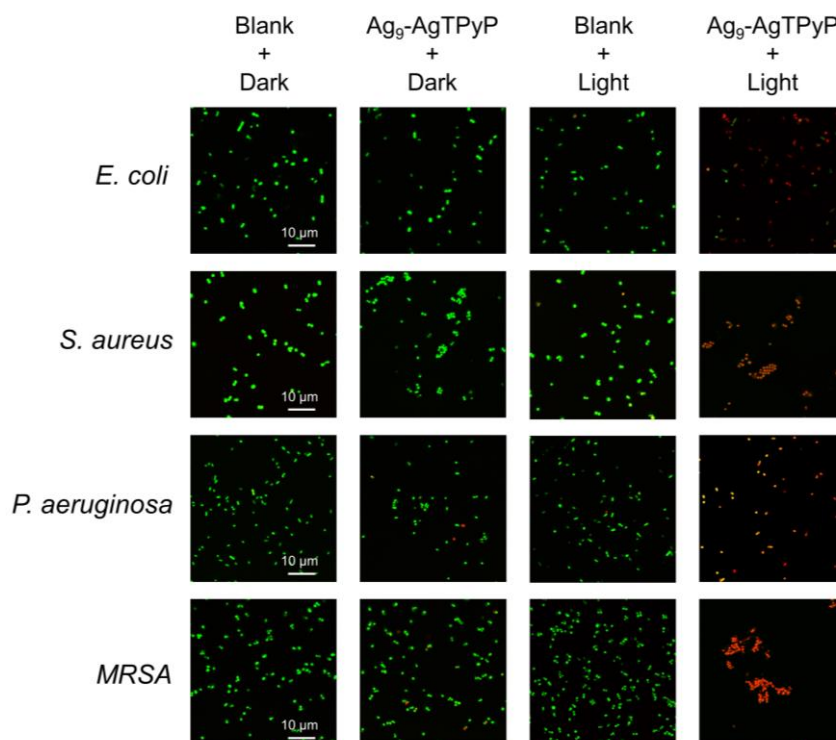

**Figure S19.** Fluorescence images of all bacterial (green) and dead bacterial (red) cells upon various treatment.

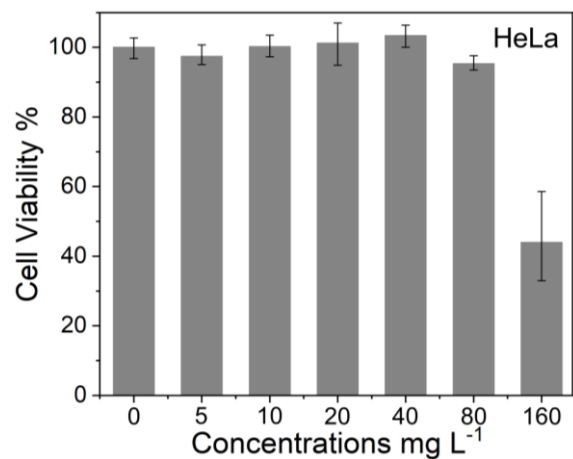

**Figure S20.** The cell cytotoxicity in vitro.

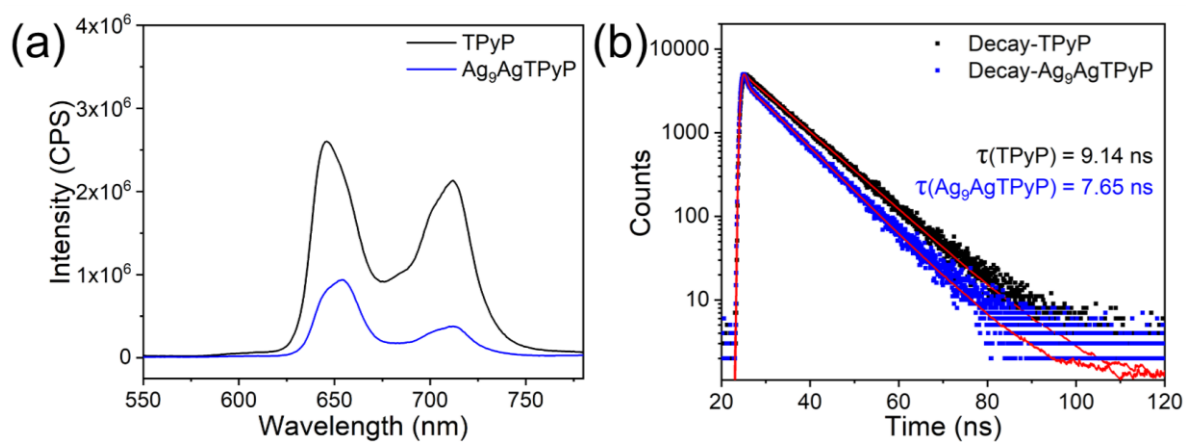

**Figure S21.** (a) Photoluminescence (PL) emission upon excitation at 405 nm and (b) time-resolved PL decay probed at 646 nm for TPyP and Ag<sub>9</sub>-AgTPyP dispersed in EtOH.

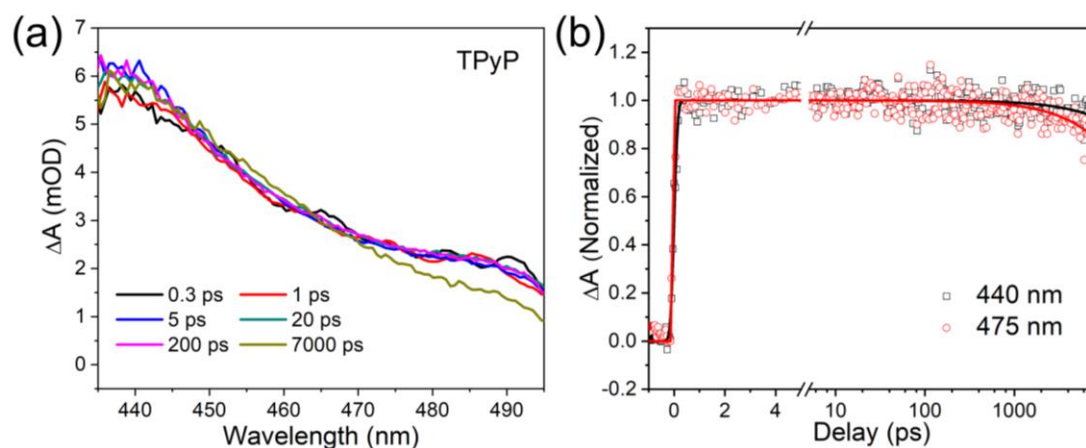

**Figure S22.** (a) TA spectra of TPyP registered at different probe delays (pump at 520 nm). (b) Representative TA kinetics of TPyP taken at the probing wavelength of 440 nm (black line) and 475 nm (red line).

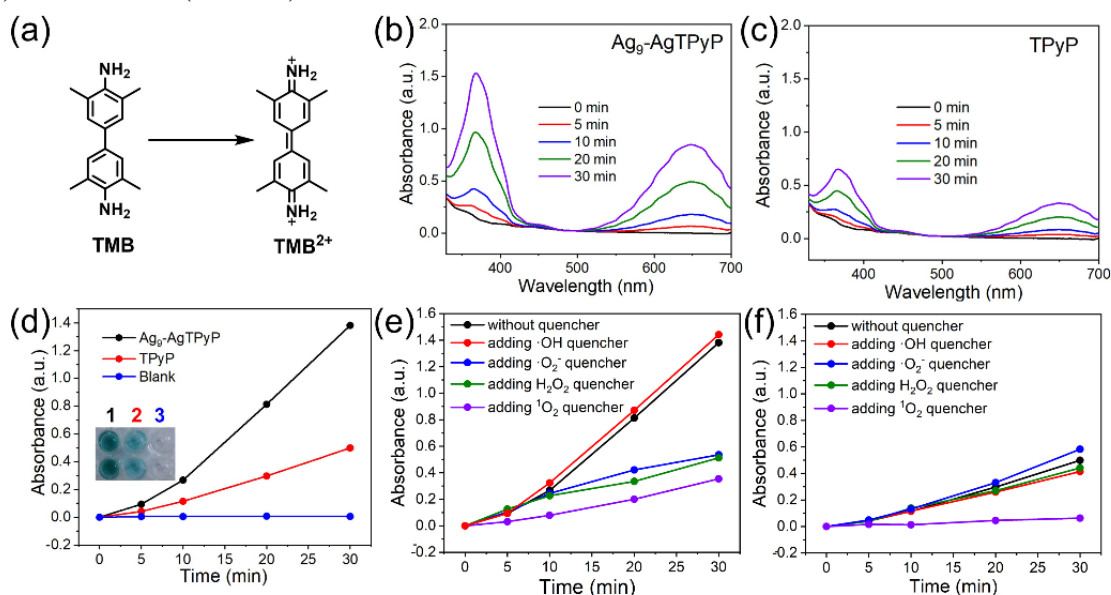

**Figure S23.** (a) The oxidation reaction equation of TMB. Time-dependent UV-vis absorption spectra recording TMB oxidation over (b) Ag<sub>9</sub>-AgTPyP and (c) TPyP. (d) Comparison of oxidase-like activity of 1 of concentration 1  $\mu$ M, the equivalent concentrations of the ligand molecules (1  $\mu$ M). (Inset) Images of the corresponding solutions of (1) Ag<sub>9</sub>-AgTPyP, (2) TPyP, (3) Blank. UV-vis absorbance for TMB oxidation product monitored at 370 nm along with reaction time over. (e) Ag<sub>9</sub>-AgTPyP and (f) TPyP in the presence of different scavengers in air atmosphere under visible light irradiation.

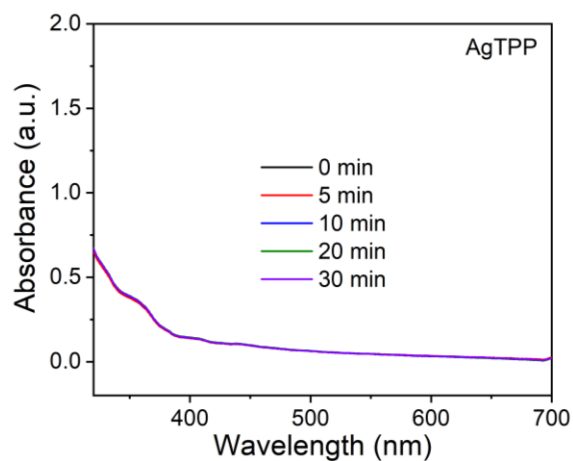

**Figure S24.** Time-dependent UV-vis absorption spectra recording TMB oxidation over AgTPP.

We have conducted the TMB oxidation experiment of AgTPP. As shown in above, AgTPP exhibited negligible activity within 30 min. The results clearly indicated that the central Ag ions in porphyrin rings could not enhance the ROS production efficiency, which is consistent with TA results.

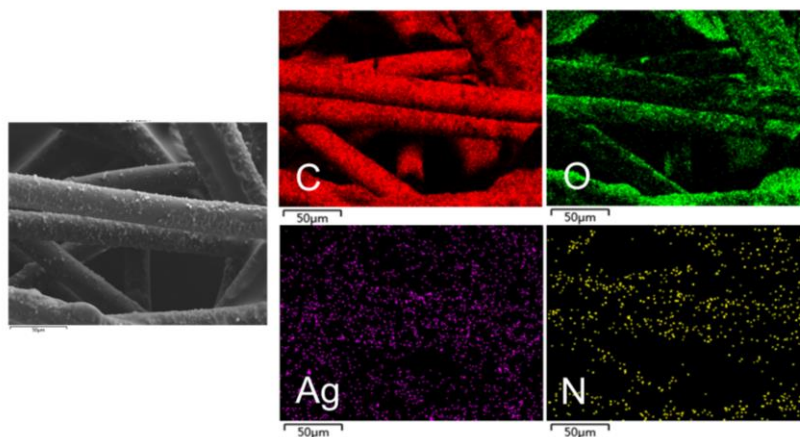

**Figure S25.** Elemental mapping analysis of Ag<sub>9</sub>-AgTPyP.

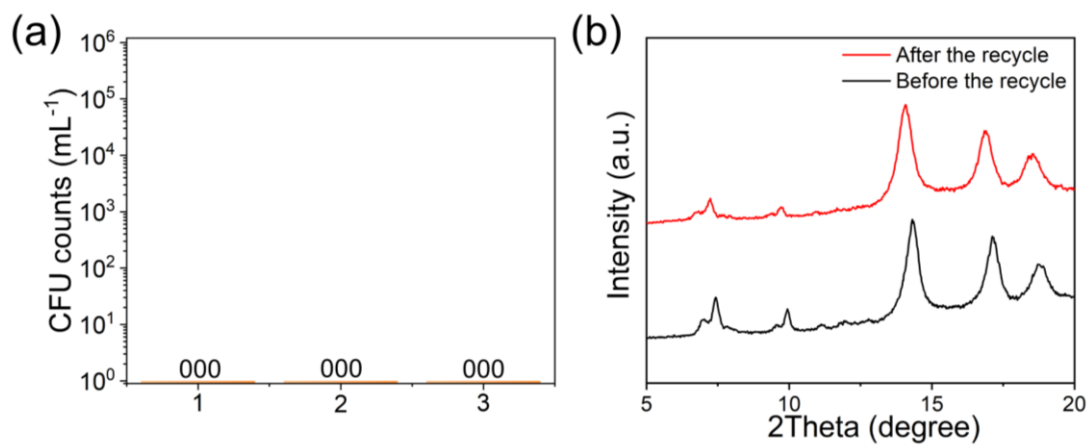

**Figure S26.** (a) Recycling test of Ag<sub>9</sub>-AgTPyP film. (d) After and before the recycle patterns of Ag<sub>9</sub>-AgTPyP film. The data marked by three zeros (000) on the bar indicate that no live bacteria were detected.



For traditional silver nanoparticles (AgNPs), they killed bacteria by releasing silver ions ( $\text{Ag}^+$ ), which further induced membrane damage, produced ROS or was untaken by cells with consequent disruption of Adenosine triphosphate (ATP) production and hindering of DNA replication activities.<sup>[1]</sup> The  $\text{Ag}^+$  release efficiency of AgNPs is limited under air conditions. Moreover, the high surface energy of AgNPs often suffered from some aggregation issues, probably leading to inferior  $\text{Ag}^+$  utilization efficiency. In contrast,  $\text{Ag}_9\text{-AgTPyP}$  used in our work, served as heterogeneous photocatalytic antibacterial material, which are functioning by producing more efficient ROS (including  $^1\text{O}_2$ ,  $\text{O}_2^-$  and  $\text{H}_2\text{O}_2$ ), which subsequently caused more lethal damage to bacteria, rather than releasing  $\text{Ag}^+$ .

**Table S1.** Crystal data and structure refinements for Ag<sub>9</sub>-AgTPyP.

| Compounds                                   | Ag <sub>9</sub> -AgTPyP                                                                       |
|---------------------------------------------|-----------------------------------------------------------------------------------------------|
| CCDC numbers                                | 2054440                                                                                       |
| Empirical formula                           | C <sub>82</sub> H <sub>78</sub> Ag <sub>10</sub> F <sub>9</sub> N <sub>8</sub> O <sub>6</sub> |
| Formula weight                              | 2521.22                                                                                       |
| Temperature/K                               | 149(2)                                                                                        |
| Crystal system                              | monoclinic                                                                                    |
| Space group                                 | C2/c                                                                                          |
| a/Å                                         | 24.5697(8)                                                                                    |
| b/Å                                         | 19.2501(5)                                                                                    |
| c/Å                                         | 22.6181(6)                                                                                    |
| α/°                                         | 90                                                                                            |
| β/°                                         | 98.112(3)                                                                                     |
| γ/°                                         | 90                                                                                            |
| Volume/Å <sup>3</sup>                       | 10590.6(5)                                                                                    |
| Z                                           | 4                                                                                             |
| ρ <sub>calc</sub> g/cm <sup>3</sup>         | 1.581                                                                                         |
| μ/mm <sup>-1</sup>                          | 14.999                                                                                        |
| F(000)                                      | 4900.0                                                                                        |
| Radiation                                   | CuKα (λ = 1.54184)                                                                            |
| 2θ range for data collection/°              | 6.77 to 124.976                                                                               |
| Index ranges                                | -28 ≤ h ≤ 24, -22 ≤ k ≤ 17, -25 ≤ l ≤ 26                                                      |
| Reflections collected                       | 21833                                                                                         |
| Independent reflections                     | 8378 [R <sub>int</sub> = 0.0641, R <sub>sigma</sub> = 0.0792]                                 |
| Goodness-of-fit on F <sup>2</sup>           | 1.072                                                                                         |
| Final R indexes [I ≥ 2σ (I)]                | R <sub>I</sub> = 0.0839, wR <sub>2</sub> = 0.2462                                             |
| Final R indexes [all data]                  | R <sub>I</sub> = 0.0960, wR <sub>2</sub> = 0.2568                                             |
| Largest diff. peak/hole / e Å <sup>-3</sup> | 1.99/-1.57                                                                                    |

<sup>a</sup>  $R_1 = \frac{\sum ||F_o| - |F_c||}{\sum |F_o|}$ , <sup>b</sup>  $wR_2 = \frac{|\sum w(|F_o|^2 - |F_c|^2)|}{\sum w(F_o^2)^2}^{1/2}$ .

**Table S2.** The selected bond lengths (Å) for Ag<sub>9</sub>-AgTPyP.

|     |       |            |     |       |           |
|-----|-------|------------|-----|-------|-----------|
| Ag1 | Ag3#1 | 2.8787(10) | C34 | C33   | 1.448(15) |
| Ag1 | Ag3   | 2.8787(10) | C34 | C35   | 1.358(14) |
| Ag1 | Ag2   | 2.8963(9)  | C33 | C28   | 1.393(14) |
| Ag1 | Ag2#1 | 2.8964(9)  | N1  | Ag1#5 | 2.389(8)  |
| Ag1 | C1    | 2.193(9)   | N1  | C27   | 1.264(15) |
| Ag1 | C1#1  | 2.193(9)   | N1  | C23   | 1.333(17) |
| Ag1 | N1#2  | 2.389(8)   | N2  | C41   | 1.343(16) |
| Ag1 | N1#3  | 2.389(8)   | N2  | C40   | 1.283(17) |
| Ag6 | N3    | 2.088(8)   | C30 | C29   | 1.478(13) |
| Ag6 | N3#4  | 2.088(8)   | C29 | C28   | 1.398(14) |
| Ag6 | N4#4  | 2.076(8)   | C2  | C3    | 1.518(9)  |
| Ag6 | N4    | 2.076(8)   | C13 | Ag4#1 | 2.134(15) |
| Ag3 | Ag2#1 | 3.0904(12) | C13 | C14   | 1.189(9)  |
| Ag3 | Ag2   | 2.9740(14) | C38 | C42   | 1.351(17) |
| Ag3 | Ag4#1 | 2.9812(12) | C38 | C39   | 1.396(17) |
| Ag3 | Ag5   | 2.9702(15) | C7  | C8    | 1.19(2)   |
| Ag3 | C1    | 2.200(9)   | O2  | Ag3#1 | 2.411(13) |
| Ag3 | C13   | 2.309(15)  | O2  | C19   | 1.416(10) |
| Ag3 | O2#1  | 2.411(13)  | C26 | C27   | 1.383(17) |
| Ag2 | Ag3#1 | 3.0902(12) | C24 | C23   | 1.388(19) |
| Ag2 | Ag4   | 2.9845(11) | O1  | C19   | 1.203(9)  |
| Ag2 | Ag5   | 2.9519(16) | C42 | C41   | 1.368(17) |
| Ag2 | C1    | 2.235(10)  | C40 | C39   | 1.364(18) |
| Ag2 | C7    | 2.256(15)  | C19 | C20   | 1.529(10) |
| Ag2 | O1    | 2.291(12)  | C14 | C15   | 1.525(10) |
| Ag4 | Ag3#1 | 2.9811(12) | C3  | C4    | 1.523(9)  |
| Ag4 | Ag5#1 | 2.8830(18) | C3  | C5    | 1.524(9)  |
| Ag4 | Ag5   | 2.8823(16) | C3  | C6    | 1.533(9)  |
| Ag4 | N2    | 2.361(9)   | F2  | C20   | 1.385(10) |
| Ag4 | C13#1 | 2.134(15)  | F1  | C20   | 1.387(10) |
| Ag4 | C7    | 2.159(16)  | F3  | C20   | 1.393(10) |
| Ag5 | Ag4#1 | 2.8830(18) | C9  | C12   | 1.528(6)  |
| Ag5 | C13   | 2.175(18)  | C9  | C8    | 1.532(10) |
| Ag5 | C7    | 2.17(2)    | C9  | C10   | 1.527(7)  |
| Ag5 | O3    | 2.241(8)   | C9  | C11   | 1.533(7)  |
| N3  | C36   | 1.353(12)  | C15 | C17   | 1.520(7)  |

# WILEY-VCH

|     |       |           |     |       |           |
|-----|-------|-----------|-----|-------|-----------|
| N3  | C33   | 1.378(13) | C15 | C16   | 1.522(7)  |
| N4  | C32   | 1.351(13) | C15 | C18   | 1.520(7)  |
| N4  | C29   | 1.351(13) | O3  | C21   | 1.386(9)  |
| C36 | C37   | 1.421(13) | O3  | C21#1 | 1.386(9)  |
| C36 | C35   | 1.430(15) | C21 | O3#1  | 1.386(9)  |
| C32 | C31   | 1.443(13) | C21 | C22   | 1.528(10) |
| C32 | C37#4 | 1.438(14) | C22 | C21#1 | 1.528(10) |
| C1  | C2    | 1.202(8)  | C22 | F6    | 1.382(8)  |
| C31 | C30   | 1.317(16) | C22 | F6#1  | 1.382(8)  |
| C25 | C28   | 1.487(13) | C22 | F5    | 1.383(7)  |
| C25 | C26   | 1.308(16) | C22 | F5#1  | 1.383(7)  |
| C25 | C24   | 1.323(17) | C22 | F4    | 1.372(7)  |
| C37 | C32#4 | 1.438(14) | C22 | F4#1  | 1.372(7)  |
| C37 | C38   | 1.480(14) | F4  | F6#1  | 0.83(4)   |

#1 1-X,+Y,1/2-Z; #2 +X,-1+Y,+Z; #3 1-X,-1+Y,1/2-Z; #4 3/2-X,3/2-Y,1-Z; #5 +X,1+Y,+Z

**Table S3.** A summary of photoactive antibacterial material.

| Sample                                   | Key Component                 | Initial bacterial concentration (CFU mL <sup>-1</sup> )                  | Type of bacteria and log <sub>10</sub> (C <sub>0</sub> /C) Efficiency                                                                      | Size and concentration                                       | References       |
|------------------------------------------|-------------------------------|--------------------------------------------------------------------------|--------------------------------------------------------------------------------------------------------------------------------------------|--------------------------------------------------------------|------------------|
| TCP-C <sub>60</sub>                      | Porphyrin, C <sub>60</sub>    | 10 <sup>4</sup>                                                          | <i>E. coli</i> (4 in 60 min)<br><i>S. aureus</i> (4 in 30 min)                                                                             | 0.09 cm <sup>2</sup> film                                    | [2]              |
| MMNPs                                    | Porphyrin, HSA, Mn            | 10 <sup>6</sup>                                                          | <i>E. coli</i> (2 in 15 min)<br><i>S. aureus</i> (1 in 15 min)                                                                             | 30 mg L <sup>-1</sup> + 100 μM H <sub>2</sub> O <sub>2</sub> | [3]              |
| CNC-Por                                  | Zn-Porphyrin                  | 10 <sup>8</sup>                                                          | <i>E. coli</i> (1.5 in 60 min)<br><i>S. aureus</i> (6 in 60 min)                                                                           | 366 mg L <sup>-1</sup>                                       | [4]              |
| CS/Ag/MoS <sub>2</sub> -Ti               | Cs, Ag, MoS <sub>2</sub> , Ti | <i>E. coli</i> (10 <sup>6</sup> )<br><i>S. aureus</i> (10 <sup>8</sup> ) | <i>E. coli</i> (2.5 in 20 min)<br><i>S. aureus</i> (2 in 20 min)                                                                           | 100 mg L <sup>-1</sup>                                       | [5]              |
| ZIF-8                                    | Zn-MOF                        | 10 <sup>7</sup>                                                          | <i>E. coli</i> (6 in 120 min)                                                                                                              | 500 mg L <sup>-1</sup>                                       | [6]              |
| FLV-MoS <sub>2</sub>                     | MoS <sub>2</sub>              | 10 <sup>6</sup>                                                          | <i>E. coli</i> (5 in 120 min)                                                                                                              | 1.6 mg L <sup>-1</sup> film                                  | [7]              |
| Cu-MoS <sub>2</sub>                      | MoS <sub>2</sub> , Cu         | 10 <sup>6</sup>                                                          | <i>E. coli</i> (5 in 20 min)                                                                                                               | 1.6 mg L <sup>-1</sup> film                                  | [7]              |
| F-g-C <sub>3</sub> N <sub>4</sub> -30-EP | C <sub>3</sub> N <sub>4</sub> | 10 <sup>6</sup>                                                          | <i>E. coli</i> (6 in 30min)                                                                                                                | 10 mg L <sup>-1</sup> film                                   | [8]              |
| <b>Ag<sub>9</sub>-AgTPyP</b>             | <b>Porphyrin, Ag</b>          | <b>10<sup>8</sup></b>                                                    | <b><i>E. coli</i> (5 in 120min)<br/><i>S. aureus</i> (7 in 90min)<br/><i>P. aeruginosa</i> (5 in 120min)<br/><i>MRSA</i> (7 in 120min)</b> | <b>50 mg L<sup>-1</sup></b>                                  | <b>This work</b> |

## References

- [1] L. Rizzello, P. P. Pompa, *Chem. Soc. Rev.* **2014**, *43*, 1501-1518.
- [2] M. B. Ballatore, J. Durantini, N. S. Gsponer, M. B. Suarez, M. Gervaldo, L. Otero, M. B. Spesia, M. E. Milanese, E. N. Durantini, *Environ. Sci. Technol.* **2015**, *49*, 7456-7463.
- [3] Q. Deng, P. Sun, L. Zhang, Z. Liu, H. Wang, J. Ren, X. Qu, *Adv. Funct. Mater.* **2019**, *29*, 1903018.
- [4] E. Feese, H. Sadeghifar, H. S. Gracz, D. S. Argyropoulos, R. A. Ghiladi, *Biomacromolecules* **2011**, *12*, 3528-3539.
- [5] M. Zhu, X. Liu, L. Tan, Z. Cui, Y. Liang, Z. Li, K. W. Kwok Yeung, S. Wu, *J. Hazard. Mater.* **2020**, *383*, 121122.
- [6] P. Li, J. Li, X. Feng, J. Li, Y. Hao, J. Zhang, H. Wang, A. Yin, J. Zhou, X. Ma, B. Wang, *Nat. Commun.* **2019**, *10*, 2177.
- [7] C. Liu, D. Kong, P. C. Hsu, H. Yuan, H. W. Lee, Y. Liu, H. Wang, S. Wang, K. Yan, D. Lin, P. A. Maraccini, K. M. Parker, A. B. Boehm, Y. Cui, *Nature Nanotech.* **2016**, *11*, 1098-1104.
- [8] Z. Teng, N. Yang, H. Lv, S. Wang, M. Hu, C. Wang, D. Wang, G. Wang, *Chem* **2019**, *5*, 664-680.
